# Supplementary material
Source: PubMed Central journal article supplement (PMC3748956)
Supplement: NIHMS488581-supplement-eTable.pdf [file NIHMS488581-supplement-eTable.pdf]

## Supplementary Online Content

Feng Z, Lepore M, Clark MA, Tyler D, Smith DB, Mor V, Fennell ML. Geographic concentration and correlates of nursing home closures: 1999-2008. Arch Intern Med. doi:10.100/archinternmed.2010.492

**eTable.** Cumulative Closures and Openings of Nursing Home Facilities and Beds, 1999-2008

This supplementary material has been provided by the authors to give readers additional information about their work.

**eTable  
Cumulative Closures and Openings of Nursing Home Facilities and Beds, 1999-2008**

|                  | [a]<br>Cumulative<br>Nursing<br>Home<br>Closures |             | [b]<br>Of [a]:<br>Ratio<br>Hospital-<br>Based to<br>Freestanding | [c]<br>Cumulative<br>Nursing<br>Home<br>Openings |            | [d]<br>Cumulative<br>Total<br>Beds<br>Closed |             | [e]<br>Of [d]:<br>Ratio<br>Hospital-<br>Based to<br>Freestanding | [f]<br>Cumulative<br>New<br>Beds<br>Added <sup>a</sup> |            | [g]=[f]-[d]<br>Cumulative<br>Net<br>Change:<br>Total Beds |             | [h]<br>Total<br>Medicare/Medicaid<br>Certified<br>Beds |                  |             | [i]<br>Medicaid<br>Nursing<br>Facility<br>Per Diem,<br>2007 (\$) <sup>b</sup> |
|------------------|--------------------------------------------------|-------------|------------------------------------------------------------------|--------------------------------------------------|------------|----------------------------------------------|-------------|------------------------------------------------------------------|--------------------------------------------------------|------------|-----------------------------------------------------------|-------------|--------------------------------------------------------|------------------|-------------|-------------------------------------------------------------------------------|
|                  | #                                                | %           |                                                                  | #                                                | %          | #                                            | %           |                                                                  | #                                                      | %          | #                                                         | %           | 1999                                                   | 2008             | % Change    |                                                                               |
| <b>NATIONAL</b>  | <b>2,902</b>                                     | <b>15.9</b> | <b>0.63</b>                                                      | <b>1,023</b>                                     | <b>5.6</b> | <b>184,264</b>                               | <b>10.1</b> | <b>0.19</b>                                                      | <b>87,362</b>                                          | <b>4.8</b> | <b>-96,902</b>                                            | <b>-5.3</b> | <b>1,717,619</b>                                       | <b>1,628,320</b> | <b>-5.2</b> |                                                                               |
| <b>Northeast</b> | <b>440</b>                                       | <b>14.1</b> | <b>0.46</b>                                                      | <b>131</b>                                       | <b>4.2</b> | <b>34,428</b>                                | <b>8.7</b>  | <b>0.14</b>                                                      | <b>14,294</b>                                          | <b>3.6</b> | <b>-20,134</b>                                            | <b>-5.1</b> | <b>381,378</b>                                         | <b>359,759</b>   | <b>-5.7</b> |                                                                               |
| CT               | 30                                               | 11.4        | 0.00                                                             | 6                                                | 2.3        | 3,497                                        | 11.0        | 0.00                                                             | 369                                                    | 1.2        | -3,128                                                    | -9.8        | 31,835                                                 | 28,396           | -10.8       | 211                                                                           |
| MA               | 135                                              | 24.0        | 0.36                                                             | 12                                               | 2.1        | 9,639                                        | 16.7        | 0.13                                                             | 936                                                    | 1.6        | -8,703                                                    | -15.1       | 55,417                                                 | 48,091           | -13.2       | 187                                                                           |
| ME               | 21                                               | 16.2        | 0.40                                                             | 1                                                | 0.8        | 773                                          | 9.8         | 0.13                                                             | 40                                                     | 0.5        | -733                                                      | -9.3        | 8,197                                                  | 7,083            | -13.6       | 173                                                                           |
| NH               | 6                                                | 7.1         | 1.00                                                             | 0                                                | 0.0        | 127                                          | 1.6         | 1.05                                                             | 0                                                      | 0.0        | -127                                                      | -1.6        | 7,876                                                  | 7,689            | -2.4        | 176                                                                           |
| NJ               | 45                                               | 11.2        | 0.45                                                             | 42                                               | 10.5       | 4,154                                        | 7.6         | 0.06                                                             | 4,808                                                  | 8.8        | 654                                                       | 1.2         | 49,640                                                 | 50,389           | 1.5         | 187                                                                           |
| NY               | 53                                               | 7.6         | 0.18                                                             | 33                                               | 4.7        | 7,258                                        | 5.7         | 0.20                                                             | 4,839                                                  | 3.8        | -2,419                                                    | -1.9        | 119,159                                                | 119,144          | 0.0         | 210                                                                           |
| PA               | 128                                              | 15.4        | 1.13                                                             | 34                                               | 4.1        | 7,541                                        | 7.9         | 0.24                                                             | 3,070                                                  | 3.2        | -4,471                                                    | -4.7        | 95,450                                                 | 86,817           | -9.0        | 185                                                                           |
| RI               | 15                                               | 14.9        | 0.25                                                             | 1                                                | 1.0        | 1,044                                        | 10.5        | 0.06                                                             | 130                                                    | 1.3        | -914                                                      | -9.2        | 10,236                                                 | 8,850            | -13.5       | 173                                                                           |
| VT               | 7                                                | 14.9        | 0.17                                                             | 2                                                | 4.3        | 395                                          | 10.7        | 0.42                                                             | 102                                                    | 2.8        | -293                                                      | -7.9        | 3,568                                                  | 3,300            | -7.5        | 152                                                                           |
| <b>Midwest</b>   | <b>858</b>                                       | <b>14.4</b> | <b>0.47</b>                                                      | <b>302</b>                                       | <b>5.1</b> | <b>53,170</b>                                | <b>9.9</b>  | <b>0.18</b>                                                      | <b>21,813</b>                                          | <b>4.1</b> | <b>-31,357</b>                                            | <b>-5.8</b> | <b>534,290</b>                                         | <b>483,719</b>   | <b>-9.5</b> |                                                                               |
| IA               | 44                                               | 9.0         | 0.47                                                             | 12                                               | 2.5        | 2,475                                        | 7.3         | 0.14                                                             | 685                                                    | 2.0        | -1,790                                                    | -5.3        | 34,222                                                 | 31,554           | -7.8        | 114                                                                           |
| IL               | 132                                              | 14.4        | 0.74                                                             | 39                                               | 4.3        | 10,606                                       | 10.0        | 0.27                                                             | 3,368                                                  | 3.2        | -7,238                                                    | -6.8        | 101,275                                                | 94,572           | -6.6        | 104                                                                           |
| IN               | 138                                              | 21.7        | 0.42                                                             | 64                                               | 10.1       | 7,495                                        | 13.4        | 0.17                                                             | 4,742                                                  | 8.5        | -2,753                                                    | -4.9        | 55,544                                                 | 48,273           | -13.1       | 137                                                                           |
| KS               | 92                                               | 21.4        | 0.59                                                             | 18                                               | 4.2        | 3,761                                        | 14.3        | 0.32                                                             | 1,023                                                  | 3.9        | -2,738                                                    | -10.4       | 25,760                                                 | 22,627           | -12.2       | 129                                                                           |
| MI               | 51                                               | 10.9        | 0.00                                                             | 21                                               | 4.5        | 5,477                                        | 10.7        | 0.00                                                             | 1,589                                                  | 3.1        | -3,888                                                    | -7.6        | 49,061                                                 | 45,888           | -6.5        | 148                                                                           |
| MN               | 58                                               | 13.0        | 0.05                                                             | 3                                                | 0.7        | 3,691                                        | 9.8         | 0.02                                                             | 105                                                    | 0.3        | -3,586                                                    | -9.6        | 43,806                                                 | 33,454           | -23.6       | 147                                                                           |
| MO               | 111                                              | 18.3        | 1.06                                                             | 35                                               | 5.8        | 6,888                                        | 12.2        | 0.31                                                             | 2,768                                                  | 4.9        | -4,120                                                    | -7.3        | 50,697                                                 | 49,302           | -2.8        | 112                                                                           |
| ND               | 6                                                | 6.7         | 2.00                                                             | 0                                                | 0.0        | 195                                          | 3.0         | 2.15                                                             | 0                                                      | 0.0        | -195                                                      | -3.0        | 7,032                                                  | 6,396            | -9.0        | 160                                                                           |
| NE               | 19                                               | 7.8         | 1.38                                                             | 5                                                | 2.1        | 991                                          | 5.8         | 1.75                                                             | 385                                                    | 2.3        | -606                                                      | -3.6        | 17,168                                                 | 16,047           | -6.5        | 131                                                                           |
| OH               | 158                                              | 14.4        | 0.44                                                             | 88                                               | 8.0        | 6,978                                        | 7.1         | 0.16                                                             | 6,200                                                  | 6.3        | -778                                                      | -0.8        | 94,912                                                 | 91,794           | -3.3        | 201                                                                           |
| SD               | 6                                                | 5.2         | 0.50                                                             | 1                                                | 0.9        | 229                                          | 3.4         | 0.30                                                             | 30                                                     | 0.4        | -199                                                      | -3.0        | 7,756                                                  | 6,486            | -16.4       | 120                                                                           |
| WI               | 43                                               | 9.9         | 0.16                                                             | 16                                               | 3.7        | 4,384                                        | 10.5        | 0.06                                                             | 918                                                    | 2.2        | -3,466                                                    | -8.3        | 47,057                                                 | 37,326           | -20.7       | 129                                                                           |
| <b>South</b>     | <b>1,122</b>                                     | <b>17.9</b> | <b>0.76</b>                                                      | <b>461</b>                                       | <b>7.3</b> | <b>69,902</b>                                | <b>11.1</b> | <b>0.18</b>                                                      | <b>41,901</b>                                          | <b>6.6</b> | <b>-28,001</b>                                            | <b>-4.4</b> | <b>561,828</b>                                         | <b>557,429</b>   | <b>-0.8</b> |                                                                               |
| AL               | 14                                               | 5.8         | 0.27                                                             | 15                                               | 6.2        | 901                                          | 3.3         | 0.11                                                             | 1,190                                                  | 4.4        | 289                                                       | 1.1         | 24,962                                                 | 26,376           | 5.7         | 158                                                                           |
| AR               | 66                                               | 23.6        | 0.38                                                             | 23                                               | 8.2        | 5,033                                        | 18.3        | 0.10                                                             | 2,246                                                  | 8.2        | -2,787                                                    | -10.2       | 24,554                                                 | 22,300           | -9.2        | 132                                                                           |
| DC               | 4                                                | 18.2        | 1.00                                                             | 1                                                | 4.5        | 499                                          | 16.0        | 0.17                                                             | 50                                                     | 1.6        | -449                                                      | -14.4       | 2,797                                                  | 2,622            | -6.3        | 234                                                                           |
| DE               | 4                                                | 8.3         | 1.00                                                             | 5                                                | 10.4       | 232                                          | 4.6         | 0.97                                                             | 420                                                    | 8.4        | 188                                                       | 3.7         | 4,535                                                  | 4,785            | 5.5         | 208                                                                           |
| FL               | 129                                              | 16.3        | 1.15                                                             | 54                                               | 6.8        | 7,673                                        | 8.7         | 0.26                                                             | 5,307                                                  | 6.0        | -2,366                                                    | -2.7        | 79,951                                                 | 79,948           | 0.0         | 173                                                                           |
| GA               | 28                                               | 7.4         | 1.33                                                             | 15                                               | 4.0        | 1,945                                        | 4.7         | 0.80                                                             | 1,090                                                  | 2.7        | -855                                                      | -2.1        | 39,475                                                 | 38,913           | -1.4        | 122                                                                           |
| KY               | 47                                               | 14.4        | 1.76                                                             | 11                                               | 3.4        | 2,292                                        | 8.4         | 0.38                                                             | 1,025                                                  | 3.8        | -1,267                                                    | -4.7        | 24,427                                                 | 24,850           | 1.7         | 152                                                                           |
| LA               | 86                                               | 23.6        | 1.00                                                             | 17                                               | 4.7        | 5,066                                        | 12.8        | 0.16                                                             | 1,457                                                  | 3.7        | -3,609                                                    | -9.1        | 37,645                                                 | 34,371           | -8.7        | 114                                                                           |
| MD               | 43                                               | 16.1        | 1.05                                                             | 15                                               | 5.6        | 2,765                                        | 8.9         | 0.41                                                             | 1,278                                                  | 4.1        | -1,487                                                    | -4.8        | 24,404                                                 | 27,443           | 12.5        | 193                                                                           |
| MS               | 37                                               | 16.0        | 1.85                                                             | 32                                               | 13.9       | 1,596                                        | 8.2         | 0.30                                                             | 2,270                                                  | 11.7       | 674                                                       | 3.5         | 17,043                                                 | 17,769           | 4.3         | —                                                                             |

|             | [a]<br>Cumulative<br>Nursing<br>Home<br>Closures |             | [b]<br>Of [a]:<br>Ratio<br>Hospital-<br>Based to<br>Freestanding |            | [c]<br>Cumulative<br>Nursing<br>Home<br>Openings |               | [d]<br>Cumulative<br>Total<br>Beds<br>Closed |             | [e]<br>Of [d]:<br>Ratio<br>Hospital-<br>Based to<br>Freestanding |            | [f]<br>Cumulative<br>New<br>Beds<br>Added <sup>a</sup> |             | [g]=[f]-[d]<br>Cumulative<br>Net<br>Change:<br>Total Beds |                | [h]<br>Total<br>Medicare/Medicaid<br>Certified<br>Beds |      |          | [i]<br>Medicaid<br>Nursing<br>Facility<br>Per Diem,<br>2007 (\$) <sup>b</sup> |
|-------------|--------------------------------------------------|-------------|------------------------------------------------------------------|------------|--------------------------------------------------|---------------|----------------------------------------------|-------------|------------------------------------------------------------------|------------|--------------------------------------------------------|-------------|-----------------------------------------------------------|----------------|--------------------------------------------------------|------|----------|-------------------------------------------------------------------------------|
|             | #                                                | %           | #                                                                | %          | #                                                | %             | #                                            | %           | #                                                                | %          | #                                                      | %           | #                                                         | %              | 1999                                                   | 2008 | % Change |                                                                               |
|             | NC                                               | 36          | 8.0                                                              | 1.25       | 43                                               | 9.5           | 2,025                                        | 4.6         | 0.30                                                             | 2,962      | 6.7                                                    | 937         | 2.1                                                       | 40,044         | 41,931                                                 | 4.7  | 135      |                                                                               |
| OK          | 128                                              | 30.0        | 0.28                                                             | 12         | 2.8                                              | 8,472         | 23.6                                         | 0.06        | 983                                                              | 2.7        | -7,489                                                 | -20.9       | 33,453                                                    | 27,366         | -18.2                                                  | 117  |          |                                                                               |
| SC          | 25                                               | 12.6        | 2.13                                                             | 18         | 9.1                                              | 875           | 4.6                                          | 0.42        | 782                                                              | 4.1        | -93                                                    | -0.5        | 16,967                                                    | 18,101         | 6.7                                                    | 136  |          |                                                                               |
| TN          | 57                                               | 15.6        | 1.28                                                             | 12         | 3.3                                              | 3,012         | 7.8                                          | 0.27        | 1,031                                                            | 2.7        | -1,981                                                 | -5.2        | 38,586                                                    | 35,424         | -8.2                                                   | 142  |          |                                                                               |
| TX          | 375                                              | 25.8        | 0.61                                                             | 163        | 11.2                                             | 24,687        | 17.6                                         | 0.12        | 17,729                                                           | 12.6       | -6,958                                                 | -5.0        | 111,853                                                   | 114,288        | 2.2                                                    | 106  |          |                                                                               |
| VA          | 26                                               | 8.7         | 0.53                                                             | 25         | 8.4                                              | 2,031         | 6.2                                          | 0.18        | 2,081                                                            | 6.4        | 50                                                     | 0.2         | 29,884                                                    | 30,524         | 2.1                                                    | 145  |          |                                                                               |
| WV          | 17                                               | 12.0        | 1.13                                                             | 0          | 0.0                                              | 798           | 7.1                                          | 0.36        | 0                                                                | 0.0        | -798                                                   | -7.1        | 11,248                                                    | 10,418         | -7.4                                                   | 170  |          |                                                                               |
| <b>West</b> | <b>482</b>                                       | <b>16.7</b> | <b>0.88</b>                                                      | <b>129</b> | <b>4.5</b>                                       | <b>26,764</b> | <b>10.5</b>                                  | <b>0.32</b> | <b>9,354</b>                                                     | <b>3.7</b> | <b>-17,410</b>                                         | <b>-6.8</b> | <b>240,123</b>                                            | <b>227,413</b> | <b>-5.3</b>                                            |      |          |                                                                               |
| AK          | 1                                                | 6.3         | —                                                                | 4          | 25.0                                             | 16            | 2.2                                          | —           | 95                                                               | 12.8       | 79                                                     | 10.7        | 726                                                       | 725            | -0.1                                                   | 384  |          |                                                                               |
| AZ          | 45                                               | 25.1        | 1.50                                                             | 18         | 10.1                                             | 2,763         | 15.2                                         | 0.55        | 1,274                                                            | 7.0        | -1,489                                                 | -8.2        | 13,801                                                    | 15,515         | 12.4                                                   | 145  |          |                                                                               |
| CA          | 233                                              | 16.0        | 0.89                                                             | 42         | 2.9                                              | 13,118        | 10.0                                         | 0.35        | 2,847                                                            | 2.2        | -10,271                                                | -7.8        | 126,902                                                   | 117,938        | -7.1                                                   | 150  |          |                                                                               |
| CO          | 33                                               | 13.7        | 0.83                                                             | 12         | 5.0                                              | 1,307         | 6.2                                          | 0.40        | 963                                                              | 4.6        | -344                                                   | -1.6        | 19,244                                                    | 19,679         | 2.3                                                    | 164  |          |                                                                               |
| HI          | 7                                                | 13.7        | 0.75                                                             | 7          | 13.7                                             | 352           | 8.4                                          | 0.19        | 332                                                              | 7.9        | -20                                                    | -0.5        | 3,788                                                     | 3,846          | 1.5                                                    | 205  |          |                                                                               |
| ID          | 11                                               | 12.4        | 2.67                                                             | 5          | 5.6                                              | 284           | 4.5                                          | 1.04        | 325                                                              | 5.1        | 41                                                     | 0.6         | 5,938                                                     | 5,954          | 0.3                                                    | 169  |          |                                                                               |
| MT          | 16                                               | 15.1        | 4.33                                                             | 0          | 0.0                                              | 467           | 6.2                                          | 3.72        | 0                                                                | 0.0        | -467                                                   | -6.2        | 7,646                                                     | 7,050          | -7.8                                                   | 146  |          |                                                                               |
| NM          | 18                                               | 20.7        | 0.80                                                             | 3          | 3.4                                              | 1,001         | 13.2                                         | 0.15        | 171                                                              | 2.3        | -830                                                   | -10.9       | 7,165                                                     | 6,580          | -8.2                                                   | 152  |          |                                                                               |
| NV          | 17                                               | 27.9        | 1.13                                                             | 14         | 23.0                                             | 1,158         | 18.2                                         | 0.29        | 1,992                                                            | 31.3       | 834                                                    | 13.1        | 5,374                                                     | 5,200          | -3.2                                                   | 169  |          |                                                                               |
| OR          | 27                                               | 16.6        | 0.59                                                             | 4          | 2.5                                              | 1,515         | 11.0                                         | 0.31        | 122                                                              | 0.9        | -1,393                                                 | -10.1       | 13,401                                                    | 12,241         | -8.7                                                   | 173  |          |                                                                               |
| UT          | 15                                               | 14.2        | 1.14                                                             | 12         | 11.3                                             | 651           | 7.7                                          | 0.25        | 651                                                              | 7.7        | 0                                                      | 0.0         | 7,384                                                     | 7,810          | 5.8                                                    | 139  |          |                                                                               |
| WA          | 57                                               | 19.6        | 0.24                                                             | 7          | 2.4                                              | 4,075         | 15.7                                         | 0.07        | 558                                                              | 2.1        | -3,517                                                 | -13.5       | 25,598                                                    | 21,882         | -14.5                                                  | 155  |          |                                                                               |
| WY          | 2                                                | 4.9         | —                                                                | 1          | 2.4                                              | 57            | 1.9                                          | —           | 24                                                               | 0.8        | -33                                                    | -1.1        | 3,156                                                     | 2,993          | -5.2                                                   | —    |          |                                                                               |

<sup>a</sup> Only beds from newly opened nursing homes are included, not counting beds added to existing nursing homes.

<sup>b</sup> Source: Houser, A., W. Fox-Grage, and M. J. Gibson. 2009. "Across the States 2009: Profiles of Long-Term Care and Independent Living." AARP Public Policy Institute.

— Data not available or not defined.
